# Supplementary material for: Multi-molar CO2 capture beyond the direct Lewis acid–base interaction mechanism
Source: Royal Society of Chemistry journal article supplement (doi:10.1039/d0cp01493a), 2020-01-01
Supplement: d0cp01493a1.pdf [file d0cp01493a1.pdf]

# Multi-molar CO<sub>2</sub> capture beyond the direct Lewis acid-base interaction mechanism

Chenchen Li,<sup>a</sup> Dongmei Lu,<sup>\*b</sup> and Chao Wu<sup>\*a</sup>

<sup>a</sup> Frontier Institute of Science and Technology, Xi'an Jiaotong University, Xi'an, Shaanxi 710054, China.

<sup>b</sup> Department of Chemistry, School of Science, Xi'an Jiaotong University, Xi'an, Shaanxi 710049, China.

\*corresponding. lvdongmei@mail.xjtu.edu.cn, chaowu@mail.xjtu.edu.cn

# Supporting Information

## Contents

|                                                                                                                                                |    |
|------------------------------------------------------------------------------------------------------------------------------------------------|----|
| <b>Figure S1</b> Structures of reported ionic liquids.....                                                                                     | 3  |
| <b>Figure S2</b> Structures of cations and anions studied in this work.....                                                                    | 3  |
| <b>Figure S3</b> Stable structures of IL-CO <sub>2</sub> complexes identified by the configuration search program.....                         | 4  |
| <b>Figure S4</b> NBO and NRT analyses of IL-CO <sub>2</sub> complexes.....                                                                     | 4  |
| <b>Figure S5</b> Configurations of the CO <sub>2</sub> absorptions over [P <sub>2222</sub> ][2-Op].....                                        | 5  |
| <b>Figure S6</b> The interconversion energetics between ion pair and ylide intermediate of [P <sub>2222</sub> ][2-Op] by the IRC method.....   | 5  |
| <b>Figure S7</b> Comparison of anion- and ylide-mediated reactions of CO <sub>2</sub> with [Mmim][2-Op].....                                   | 6  |
| <b>Figure S8</b> Configurations of the CO <sub>2</sub> absorptions over [Mmim][2-Op].....                                                      | 6  |
| <b>Figure S9</b> Comparison of anion- and ylide-mediated reactions of CO <sub>2</sub> with [Mpr][2-Op].....                                    | 7  |
| <b>Figure S10</b> Configurations of the CO <sub>2</sub> absorptions over [Mpr][2-Op].....                                                      | 7  |
| <b>Figure S11</b> Configurations of [P <sub>2222</sub> ][2-Op]-2CO <sub>2</sub> complexes through two ways of post proton transfer routes..... | 8  |
| <b>Figure S12</b> Configurations of the CO <sub>2</sub> absorptions over [P <sub>2222</sub> ][2-Op] dimer.....                                 | 8  |
| <b>Figure S13</b> Comparison of anion- and ylide-mediated reactions of CO <sub>2</sub> with [Mmim][2-Op] dimer.....                            | 9  |
| <b>Figure S14</b> Configurations of the CO <sub>2</sub> absorptions over [Mmim][2-Op] dimer.....                                               | 9  |
| <b>Figure S15</b> Configurations of the CO <sub>2</sub> absorptions over [Mpr][2-Op] dimer.....                                                | 10 |
| <b>Figure S16</b> Comparison of most stable ylide-mediated configurations using the monomer and dimer models.....                              | 10 |

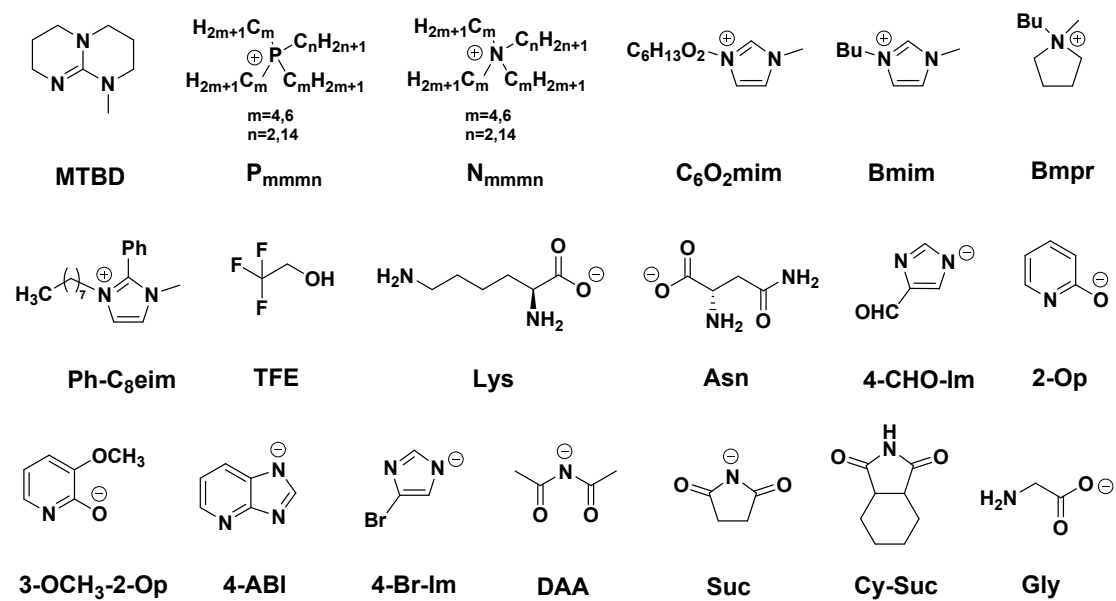

**Figure S1.** Structures of recently reported ionic liquids in Table 1 of manuscript.

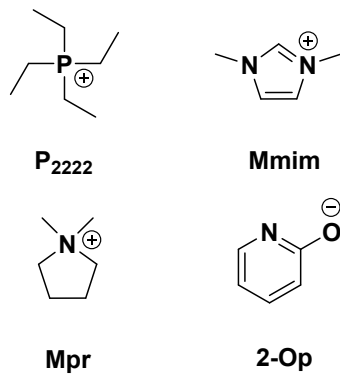

**Figure S2.** Cations and anions studied in this work.

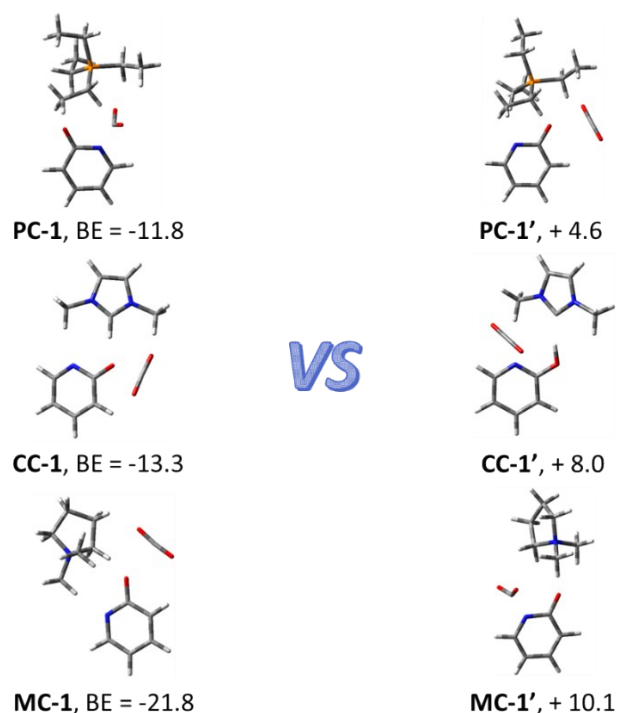

**Figure S3.** Stable structures of IL-CO<sub>2</sub> complexes identified by the configuration search program. The name and the binding energy or the relative binding energy with respect to the most stable one (in kJ/mol) are given below each configuration. Red is oxygen, blue is nitrogen, orange is phosphorous, gray is carbon and white is hydrogen.

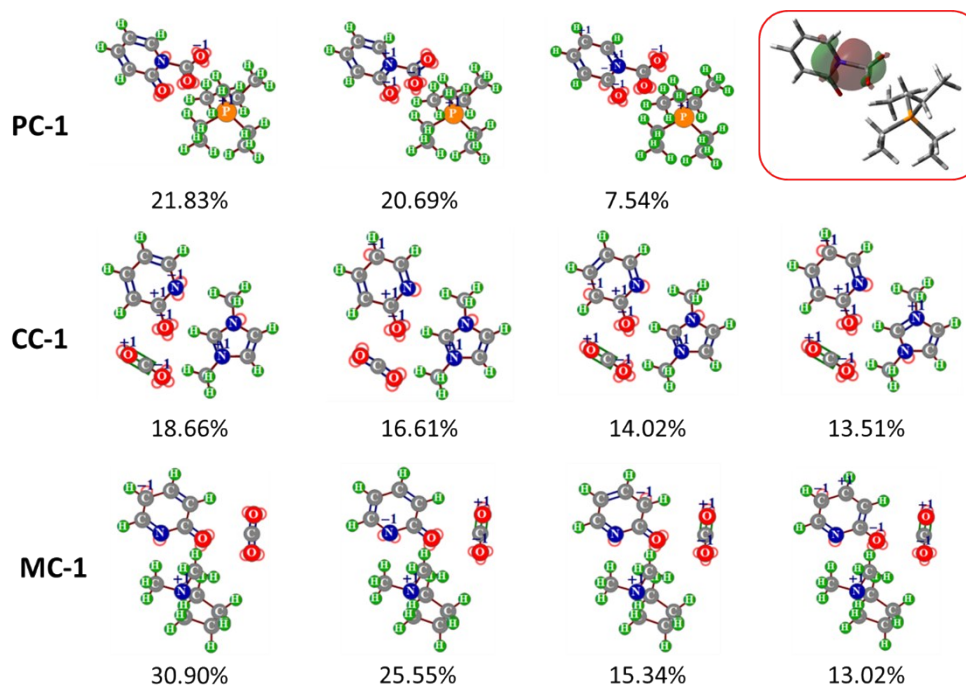

**Figure S4.** NBO and NRT analyses of IL-CO<sub>2</sub> complexes. Leading Lewis resonance structures and their abundance of the corresponding complexes are plotted. Each half circle represents a pair of electrons and formal charges are placed above the corresponding atoms. The NBO decomposition of the N-C bond of [P<sub>2222</sub>][2-Op] is highlighted in red box.

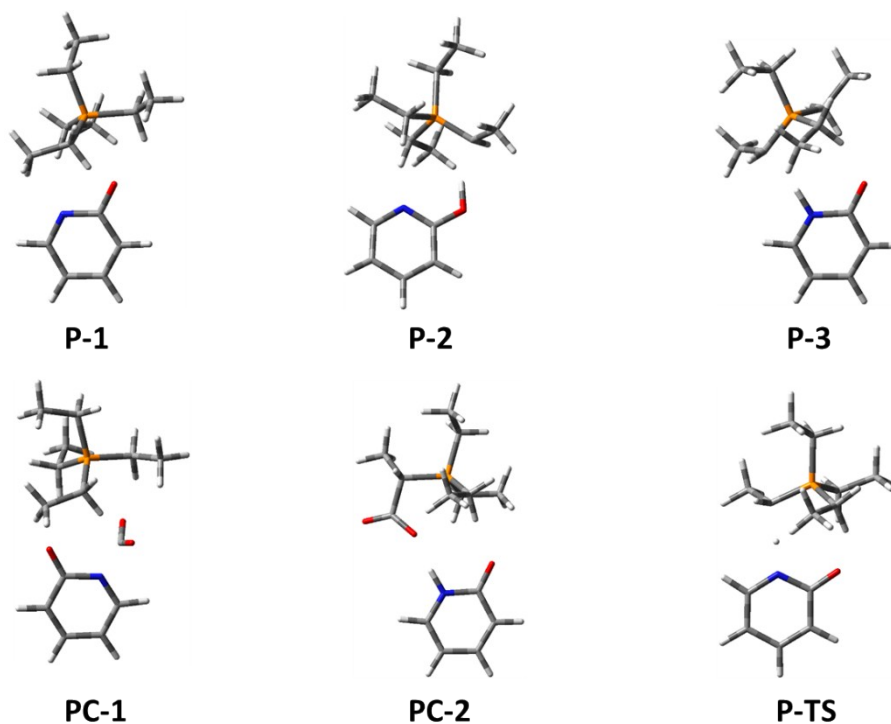

**Figure S5.** Configurations of the CO<sub>2</sub> absorptions over [P<sub>2222</sub>][2-Op].

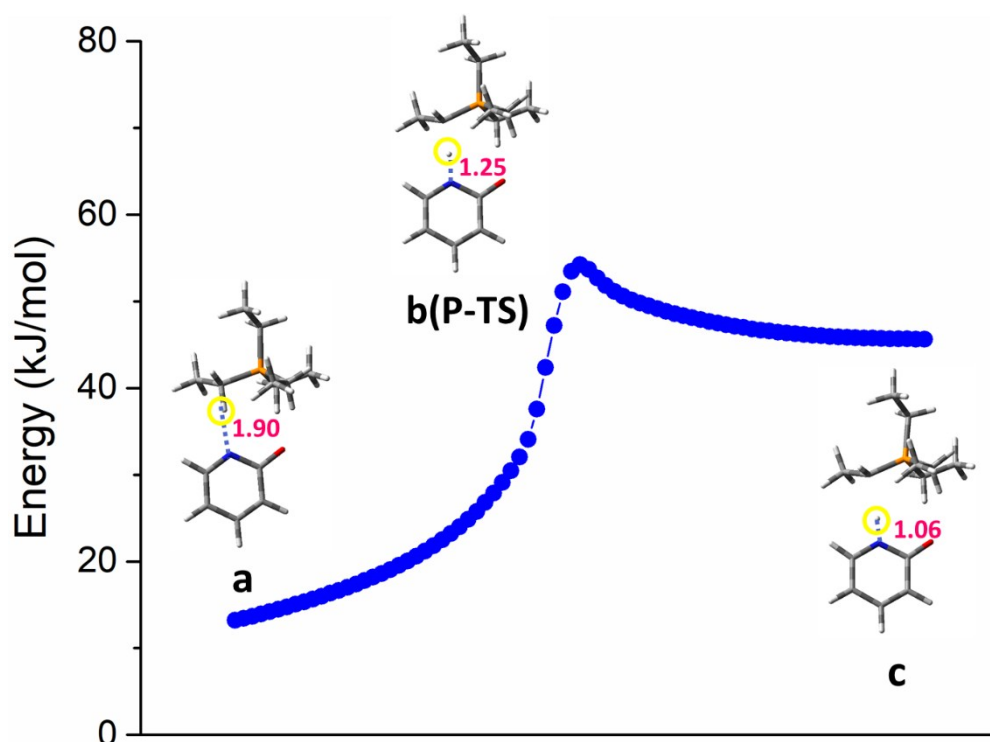

**Figure S6.** The interconversion energetics between ion pair and ylide intermediate of [P<sub>2222</sub>][2-Op] by the IRC method. Key structures are labeled and plotted. The electronic energy of ion pair [P<sub>2222</sub>][2-Op] is chosen as reference point. The transferring proton is highlighted.

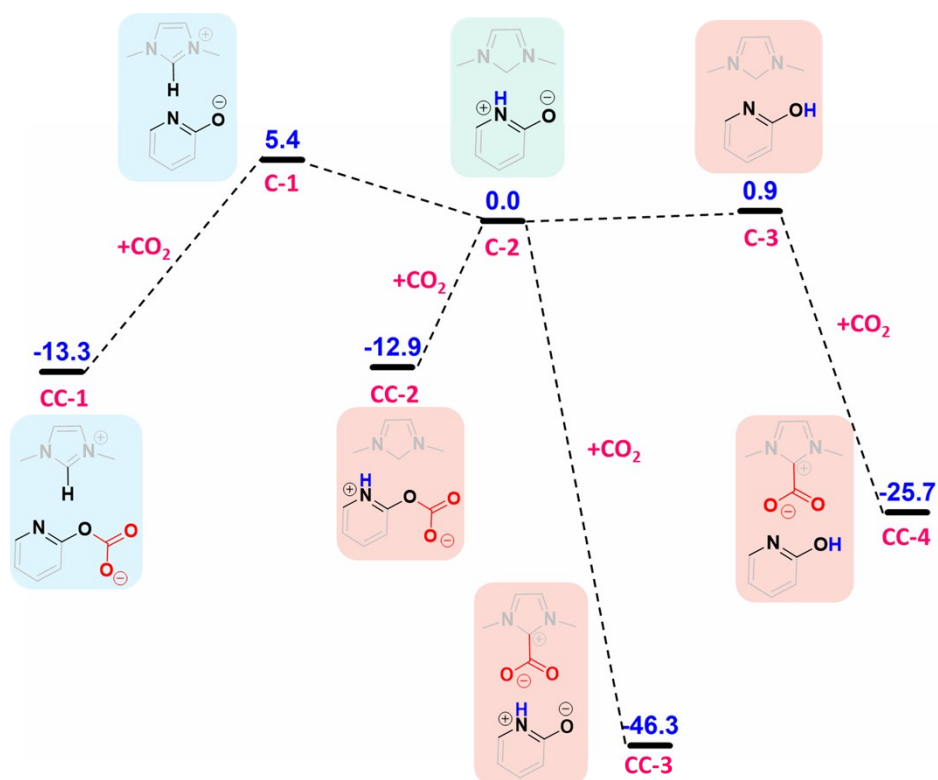

**Figure S7.** Comparison of conventional anion-mediated (in blue box) and proton transfer related (in orange boxes) reactions of  $\text{CO}_2$  with  $[\text{Mmim}][2\text{-Op}]$ . The name and relative energies are given (in kJ/mol).

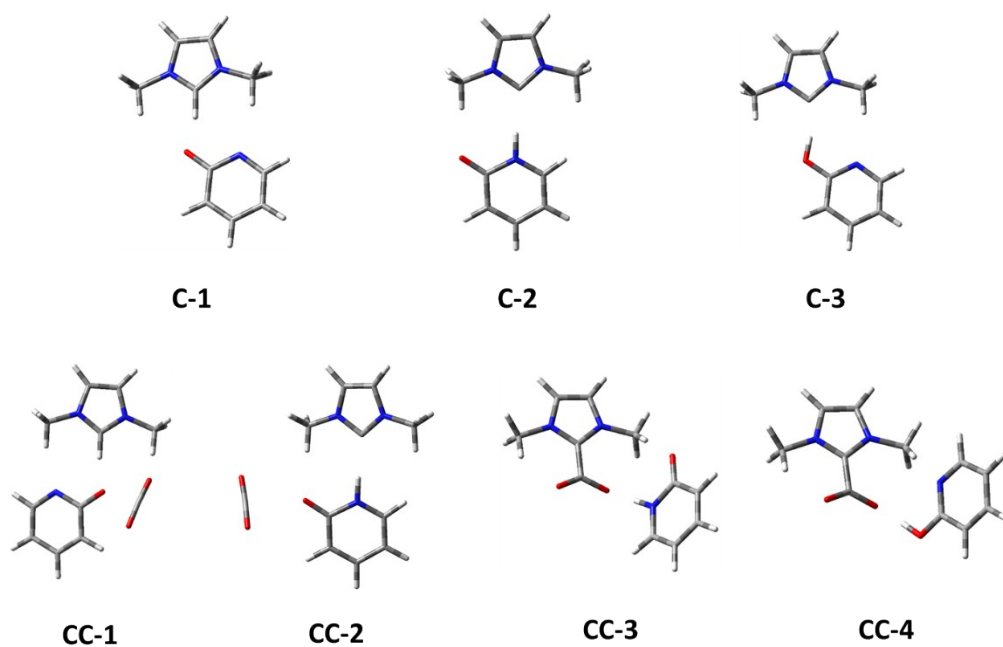

**Figure S8.** Configurations of the  $\text{CO}_2$  absorptions over  $[\text{Mmim}][2\text{-Op}]$ .

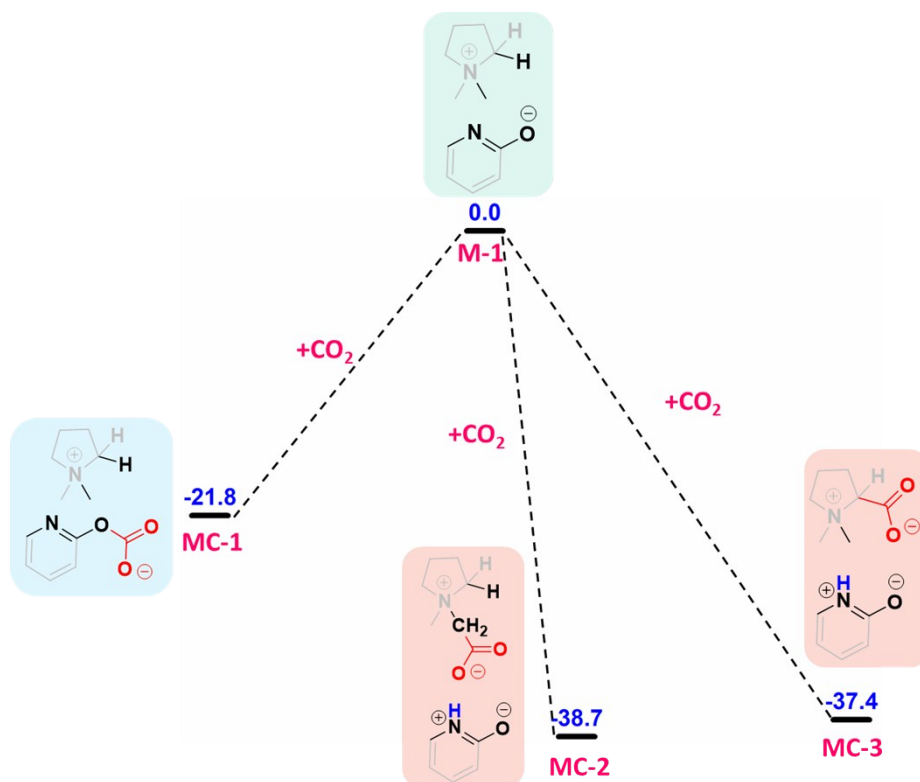

**Figure S9.** Comparison of conventional anion-mediated (in blue box) and proton transfer related (in orange boxes) reactions of CO<sub>2</sub> with [Mpr][2-Op]. The name and relative energies are given (in kJ/mol).

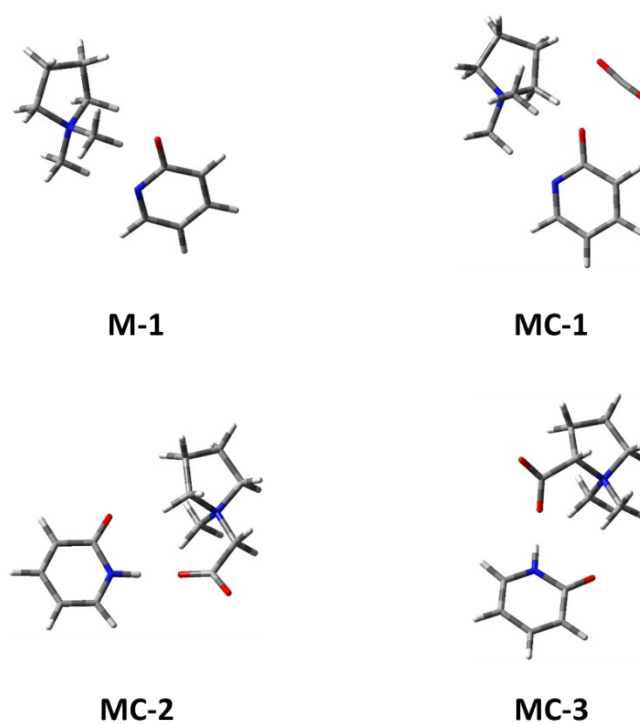

**Figure S10.** Configurations of the CO<sub>2</sub> absorptions over [Mpr][2-Op].

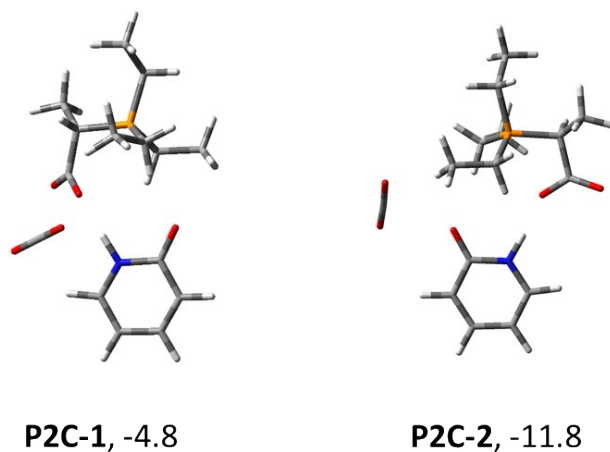

**Figure S11.** Configurations of  $[P_{222}][2\text{-Op}]\text{-}2\text{CO}_2$  complexes through two ways of post proton transfer routes. The name and sequential binding energies are given (in kJ/mol).

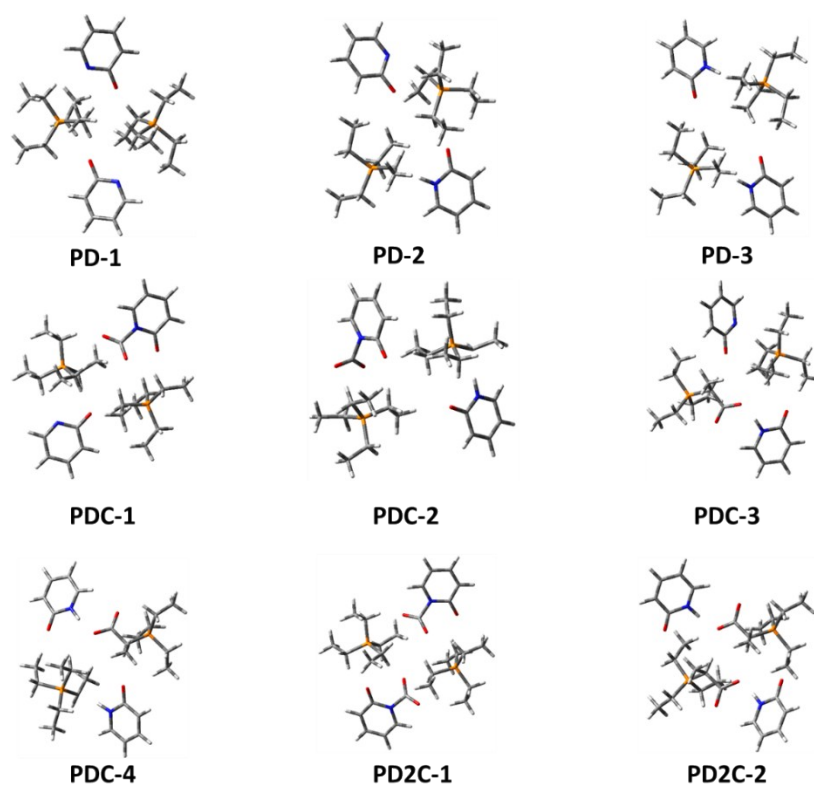

**Figure S12.** Configurations of the  $\text{CO}_2$  absorptions over  $[P_{222}][2\text{-Op}]$  dimer.



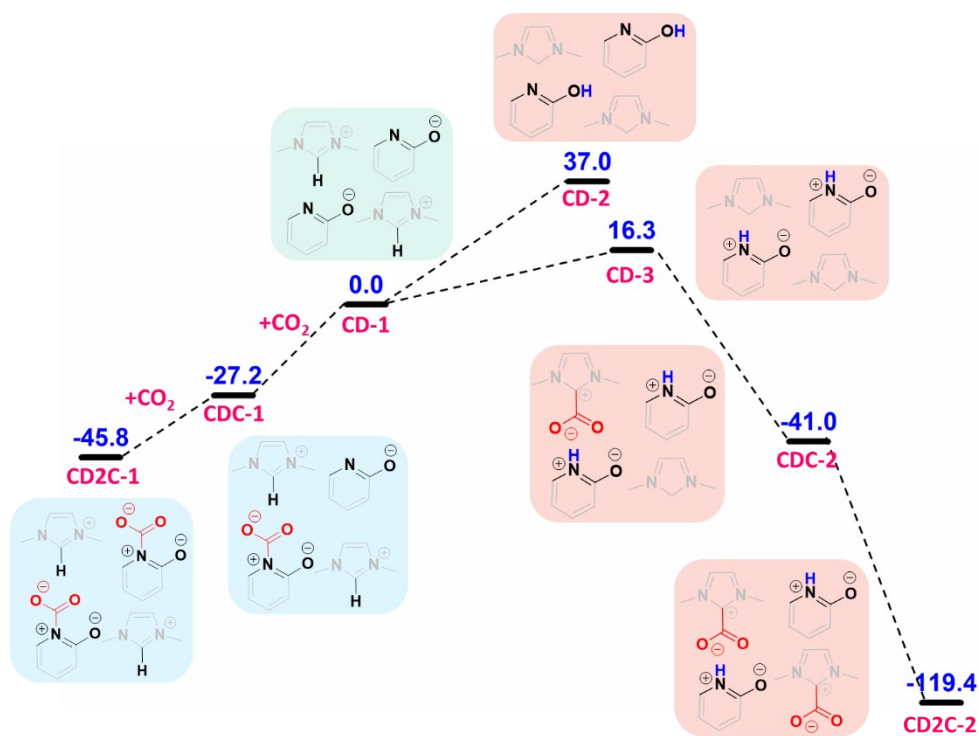

**Figure S13.** Comparison of conventional anion-mediated (in blue box) and proton transfer related (in orange boxes) reactions of CO<sub>2</sub> with [Mmim][2-Op] dimer. The name and relative energies are given (in kJ/mol).

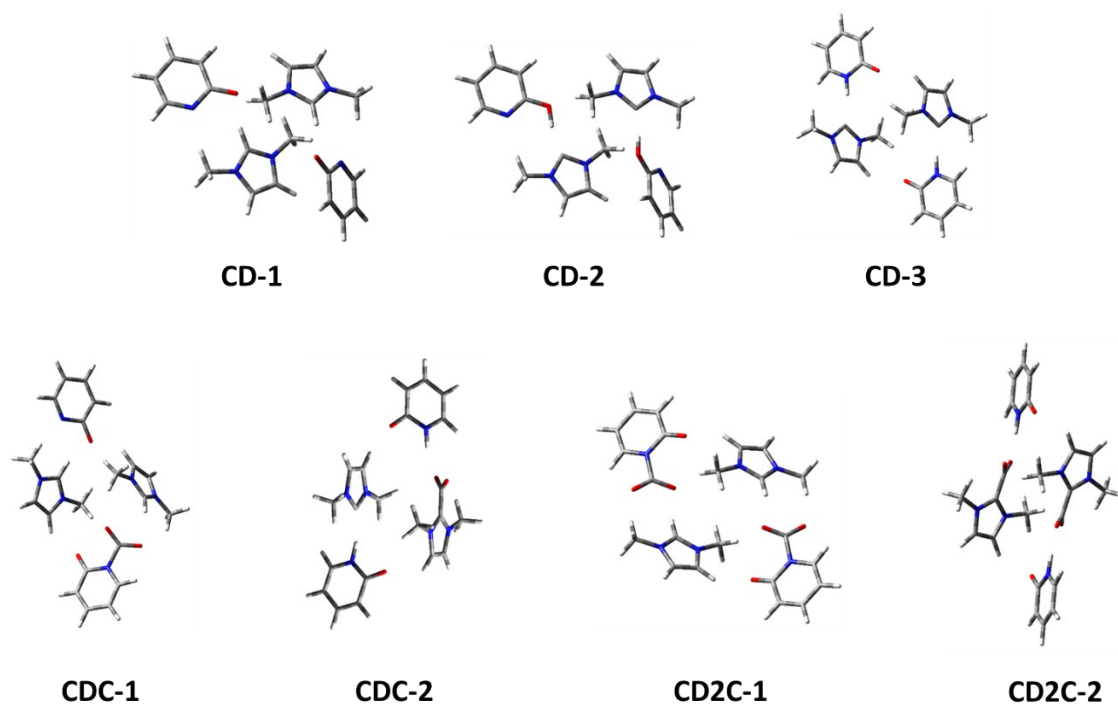

**Figure S14.** Configurations of the CO<sub>2</sub> absorptions over [Mmim][2-Op] dimer.

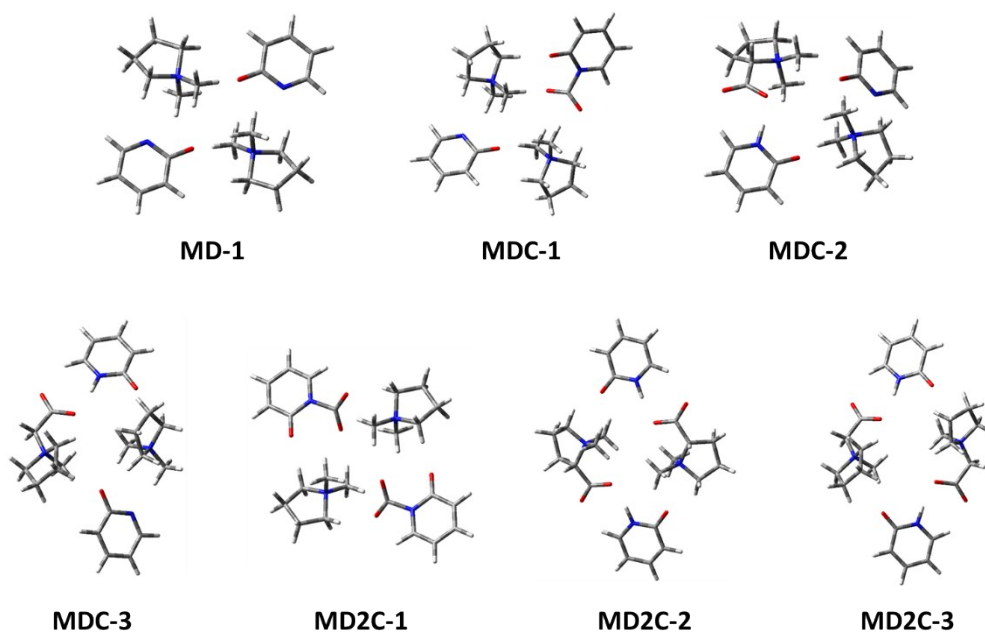

**FigureS15.** Configurations of the CO<sub>2</sub> absorptions over [Mpr][2-Op] dimer.

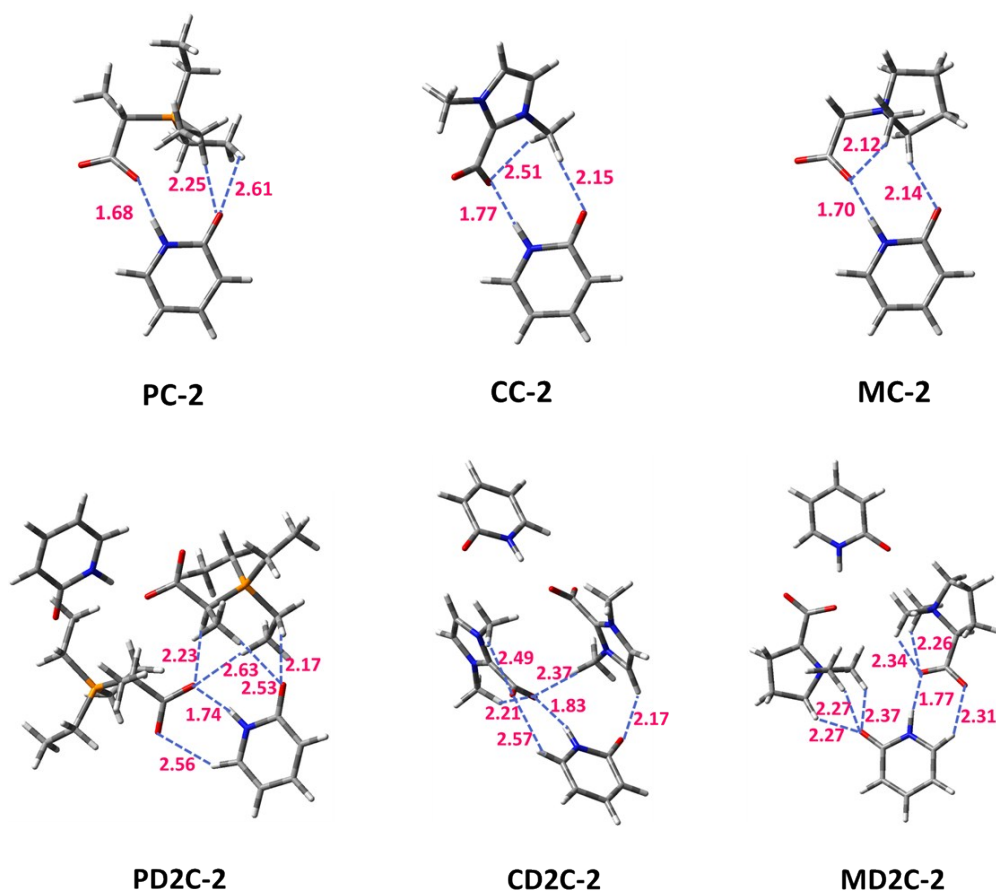

**Figure S16.** Comparison of most stable ylide-mediated configurations using the monomer and dimer models. Key intermolecular hydrogen bonds are labelled.
